# Supplementary material
Source: PubMed Central journal article supplement (PMC122899)
Supplement: pnas_092143499_2.pdf [file pnas_092143499_2.pdf]

**A.**

T7pro20

GGTAATACGACTCACTATAG

**B.**

T7GFP5S

AAGAAGAAGTCGTGCTGCTTCTATAGTGAGTCGTATTACC

T7GFP5AS

ATGAAGCAGCACGACTTCTTCTATAGTGAGTCGTATTACC

T7GFP5m1S

AAGAAGAAGTCCAGCTGCTTCTATAGTGAGTCGTATTACC

T7GFP5m1AS

ATGAAGCAGCTGGACTTCTTCTATAGTGAGTCGTATTACC

T7GFP2S

AAGACCATGTGATCGCGCTTCTATAGTGAGTCGTATTACC

T7GFP2AS

GAGAAGCGCGATCACATGGTCTATAGTGAGTCGTATTACC

T7GFP5HP1

AAGAAGAAGTCGTGCTGCTTCCATGAAGCAGCACGACTTCTTCTATAGTGAGTCGTATTA

T7GFP5HP1S

ATGAAGCAGCACGACTTCTTCTTGAAGAAGTCGTGCTGCTTCTATAGTGAGTCGTATTA

T7GFP5HP1m1

AAGAAGAAGTCCAGCTGCTTCCATGAAGCAGCTGGACTTCTTCTATAGTGAGTCGTATTA

T7GFP5HP1m2

AAGAAGAAGTCGTGCTGCTTCCATGAAGCAGCTCGACTTCTTCTATAGTGAGTCGTATTA

T7GFP5HP1m3

AAGAAGAAGTCCTGCTGCTTCCATGAAGCAGCACGACTTCTTCTATAGTGAGTCGTATTA

T7BT4S

AAGACAGAGCCAAGTGGACTCTATAGTGAGTCGTATTACC

T7BT4AS

GTGAGTCCACTTGGCTCTGTCTATAGTGAGTCGTATTACC

T7BT4m1S

AAGACAGAGCGTAGTGGACTCTATAGTGAGTCGTATTACC

T7BT4m1AS

GTGAGTCCACTACGCTCTGTCTATAGTGAGTCGTATTACC

T7BT4HP1

AAGACAGAGCCAAGTGGACTCTGTGAGTCCACTTGGCTCTGTCTATAGTGAGTCGTATTACC

T7BT4HP1m1

AAGACAGAGCGTAGTGGACTCTGTGAGTCCACTACGCTCTGTCTATAGTGAGTCGTATTACC

C.

U6-BT4s

TTTGAGTCCACTTGGCTCTGTCTTTTT  
TCAGGTGAACCGAGACAGAAAAGATC

U6-BT4as

TTTGACAGAGCCAAGTGGACTCTTTTT  
TGTCTCGGTTACCTGAGAAAAGATC

U6-BT4m1s

TTTGAGTCCACTTCCCTCTGTCTTTTT  
TCAGGTGAAGGGAGACAGAAAAGATC

U6-BT4m1as

TTTGACAGAGGGAAGTGGACTCTTTTT  
TGTCTCCCTTACCTGAGAAAAGATC

U6-BT5s

TTTGGCTCCCAGGTTAAAGTCCTTTTT  
CGAGGTCCAATTCAGGAAAAGATC

U6-BT5as

TTTGACTTTAACCTGGGAGCCTTTTT  
CTGAAATTGGACCCTCGGAAAAAGATC

U6-BT4HP1

TTTGACAGAGCCAAGTGGACTCACAGAGTCCACTTGGCTCTGTCTTTTT  
TGTCTCGGTTACCTGAGTGTCTCAGGTGAACCGAGACAGAAAAAGATC

U6-BT4HP2

TTTGACAGAGCCAAGTGGACTCACAGAGTCCACTTCGCTCTGTCTTTTT  
TGTCTCGGTTACCTGAGTGTCTCAGGTGAAGCGAGACAGAAAAAGATC

U6-BT4HP2m1

TTTGACAGAGCGTAGTGGACTCACAGAGTCCACTAGGCTCTGTCTTTTT  
TGTCTCGCATCACCTGAGTGTCTCAGGTGATCCGAGACAGAAAAAGATC
